# Supplementary material for: Monodispersed ultrathin GdF3 nanowires: oriented attachment, luminescence, and relaxivity for MRI contrast agents
Source: Royal Society of Chemistry journal article supplement (doi:10.1039/c2jm34987f), 2012-01-01
Supplement: c2jm34987f.pdf [file c2jm34987f.pdf]

## Electronic Supplementary Information

# Monodispersed GdF<sub>3</sub> ultrathin-nanowires: oriented attachment, luminescence, and relaxivity for MRI contrast agent

Yang Tian,\* Hong-Yu Yang, Kai Li, and Xue Jin

Department of Chemistry, Capital Normal University, Beijing, P. R. China, 100048

Corresponding author: tianyang@mail.sdu.edu.cn

**Fig. S1** TEM image of the GdF<sub>3</sub> nanocrystals prepared by reacting for 24 h

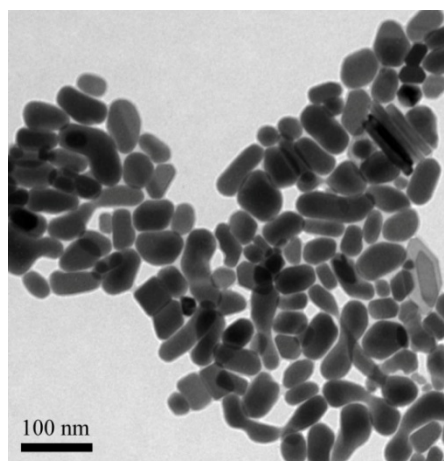

**Fig. S2** TEM image of the product obtained from the reaction lasting for 5 min.

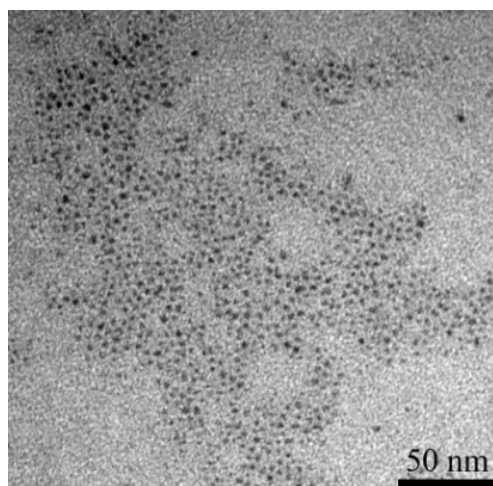

**Fig. S3** TEM image of the product obtained from the reaction lasting for 10 min.

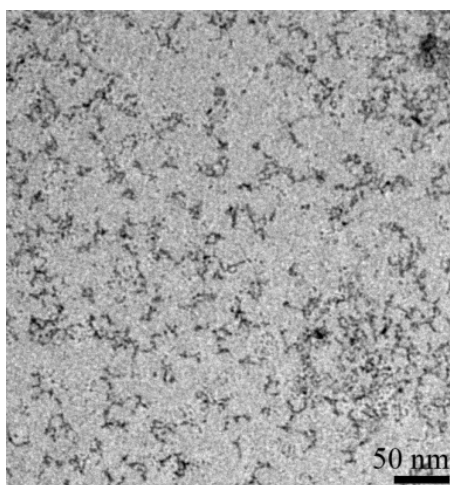

**Fig. S4** Fast Fourier transform (FFT) of twin-crystal

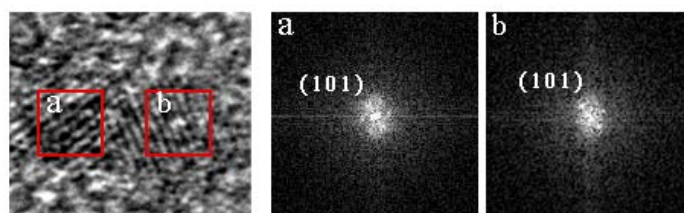

**Fig. S5** TEM image of the ultrathin GdF<sub>3</sub> nanowires doped with Eu<sup>3+</sup>

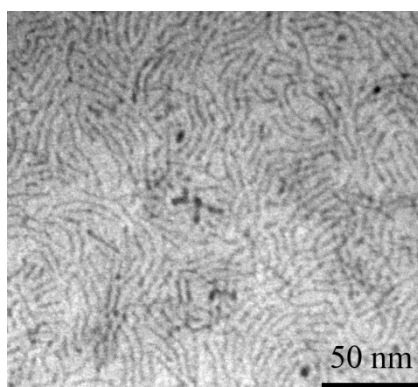

**Fig. S6** EDX spectrum of the obtained GdF<sub>3</sub> nanowires doped with Eu<sup>3+</sup>

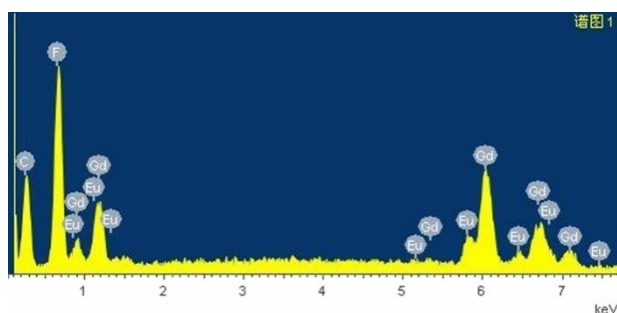

**Table S1** Decay components of the obtained Eu<sup>3+</sup>-doping GdF<sub>3</sub> nanowires with concentrations of 5 mol %, 10 mol %, and 20 mol %.

| Eu <sup>3+</sup> concentration (mol %) | $\tau_1$ (ms) | $\tau_1$ component (%) | $\tau_2$ (ms) | $\tau_2$ component (%) |
|----------------------------------------|---------------|------------------------|---------------|------------------------|
| 5                                      | 1.41          | 15.47                  | 4.31          | 84.53                  |
| 10                                     | 1.25          | 18.06                  | 3.73          | 81.94                  |
| 20                                     | 1.15          | 13.74                  | 3.56          | 86.26                  |

**Fig. S7** Photograph (a) and TEM image (b) of the ultrathin GdF<sub>3</sub> nanowires in the water after being modified with PF127.

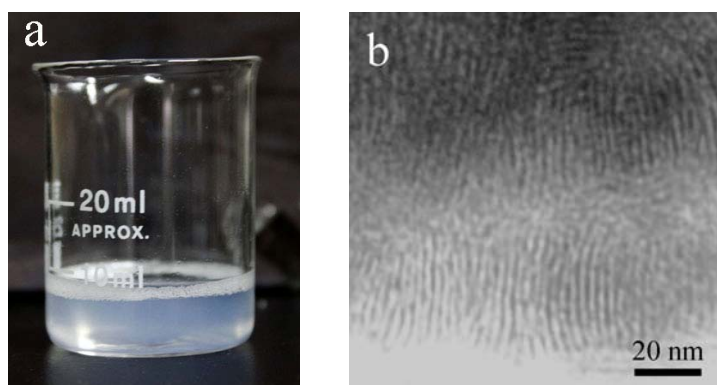

### Surface-to-volume ratio calculations for 0D nanoparticles and 1D nanowires:

The surface-to-volume ratio described as the following equation:

$$A = \frac{S}{V}$$

The radius of spherical nanoparticles is  $r_s$ . The specific surface area of spherical nanoparticles can be calculated by the equation:

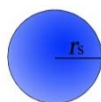

$$A_s = \frac{4\pi r_s^2}{\frac{4}{3}\pi r_s^3}$$

$$A_s = \frac{3}{r_s}$$

The radius of nanowires is  $r_w$  and the length is  $l$ . For ultrathin nanowires,  $r_w \ll l$ .  $A_w$  can be obtained in the same way:

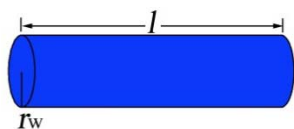

$$\begin{aligned} A_w &= \frac{2\pi r_w^2 + 2\pi r_w l}{\pi r_w^2 l} = \frac{2\pi r_w (r_w + l)}{\pi r_w^2 l} \\ &= \frac{2(r_w + l)}{r_w l} \approx \frac{2l}{r_w l} \quad (r_w \ll l) \end{aligned}$$

$$A_w = \frac{2}{r_w}$$
